# Supplementary material for: Serum-free Erythroid Differentiation for Efficient Genetic Modification and High-Level Adult Hemoglobin Production
Source: PubMed Central journal article supplement — Mol Ther Methods Clin Dev. 2018 Mar 22;9:247–56. doi: 10.1016/j.omtm.2018.03.007 (PMC5948232; doi:10.1016/j.omtm.2018.03.007), 2018-03-22

**OMTM, Volume 9**

**Supplemental Information**

**Serum-free Erythroid Differentiation for  
Efficient Genetic Modification and High-Level  
Adult Hemoglobin Production**

**Naoya Uchida, Selami Demirci, Juan J. Haro-Mora, Atsushi Fujita, Lydia N. Raines, Matthew M. Hsieh, and John F. Tisdale**

## Supplementary figures

### Supplementary figure 1. Flow cytometry panels for lentiviral transduction of human CD34<sup>+</sup>

cells before and after initiating erythroid differentiation. (a) Dot plot panels for co-expression

of GPA and CD71 in CD34<sup>+</sup> cell-derived erythroid cells with lentiviral transduction 12 days after

differentiation. (b) Histograms of GFP expression in CD34<sup>+</sup> cell-derived erythroid cells with

lentiviral transduction 12 days after differentiation. Values: mean  $\pm$  SEM. All experiments were

performed in triplicate.

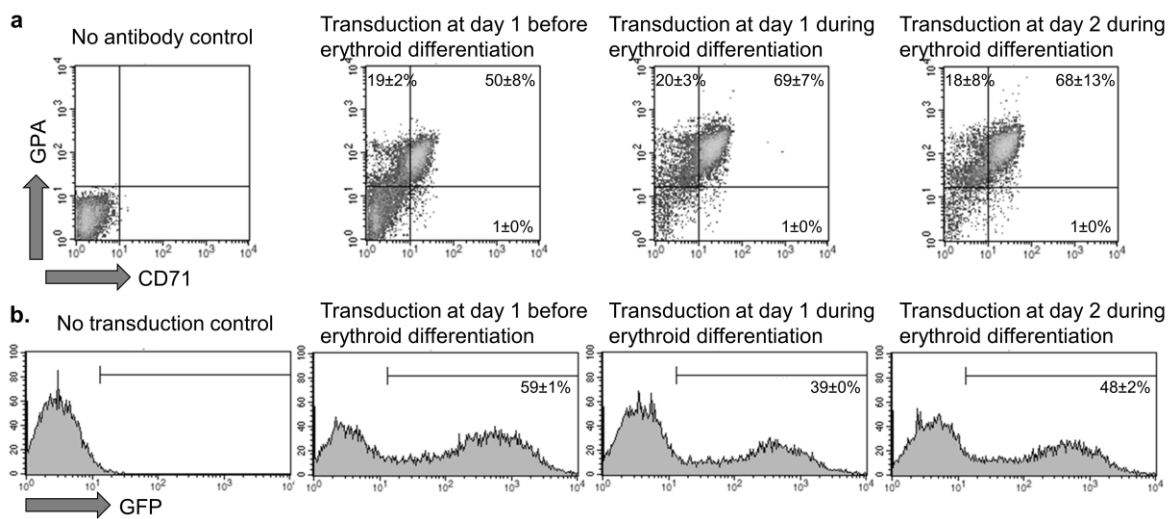

**Supplementary figure 2. Flow cytometry panels for transduction in serum-free erythroid differentiation for human CD34<sup>+</sup> cells and PBMCs.** (a) Dot plot panels for co-expression of GPA and CD71 in CD34<sup>+</sup> cell and PBMC-derived erythroid cells with lentiviral transduction 11 days after differentiation. (b) Histograms of GFP expression in CD34<sup>+</sup> cell and PBMC-derived erythroid cells with lentiviral transduction 11 days after differentiation. Values: mean  $\pm$  SEM. All experiments were performed in triplicate.

**a. CD34<sup>+</sup> cells**

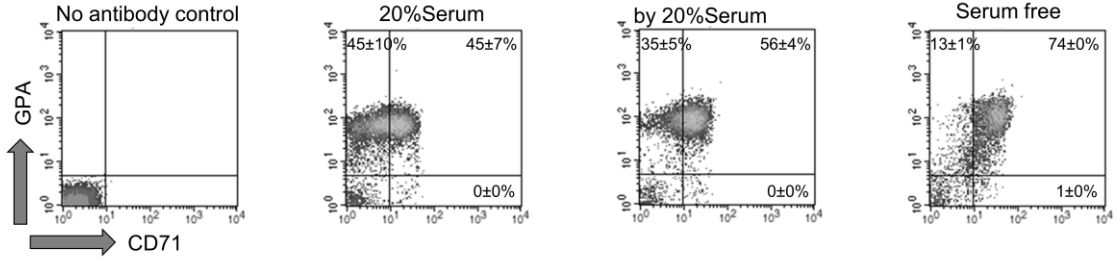

**PBMCs**

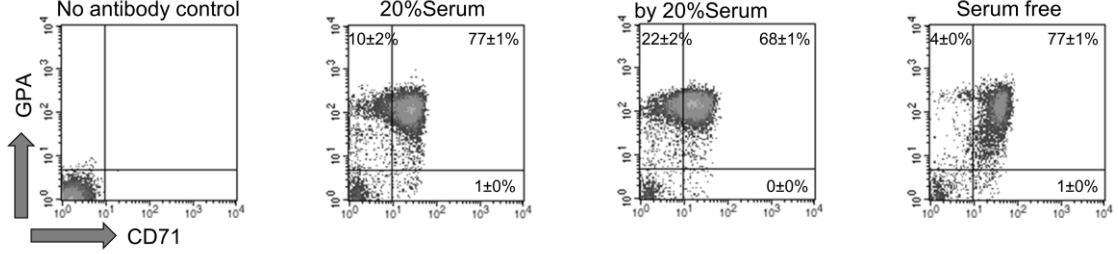

**b. CD34<sup>+</sup> cells**

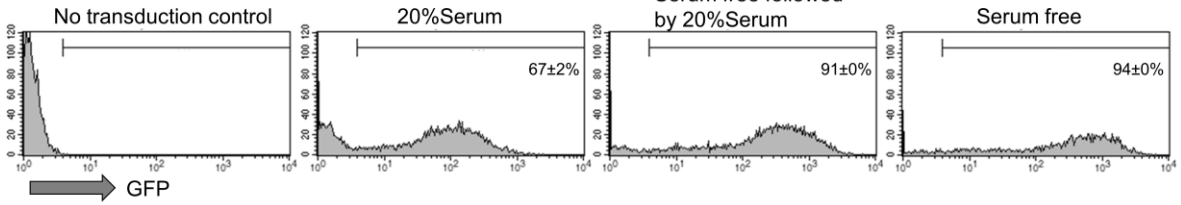

**PBMCs**

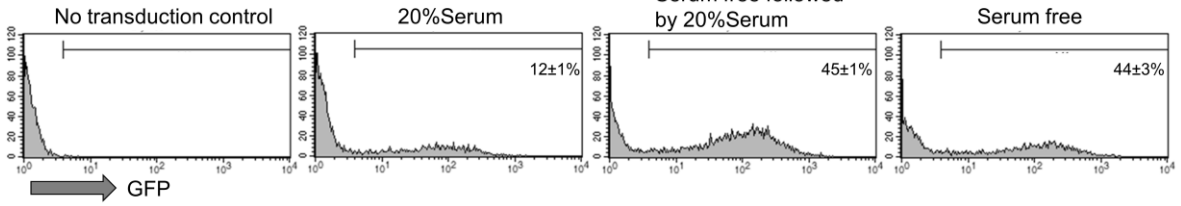

**Supplementary figure 3. Cell morphology and RP-HPLC panels for  $\beta$ -globin production with IMDM-based serum-free erythroid differentiation media with KSR supplementation.**

(a) Two weeks after serum-containing or serum-free erythroid differentiation, cell morphology was evaluated by cytopspin with Wright-Giemsa stain in CD34<sup>+</sup> cell- and PBMC-derived erythroid cells. (b) Enucleation was analyzed by flow cytometry with Hoechst 33342 stain. (c) RP-HPLC peaks of  $\beta$ -globin and  $\gamma$ -globin production from differentiated erythroid cells with 20% serum (1xSCF), 20% KSR (1xSCF), and 20% KSR (5xSCF). Bars: mean  $\pm$  SEM. Gray arrow:  $\beta$ -globin, white arrow: G $\gamma$ -globin, black arrow: A $\gamma$ -globin.

**a. CD34<sup>+</sup> cells** IMDM + 20%Serum

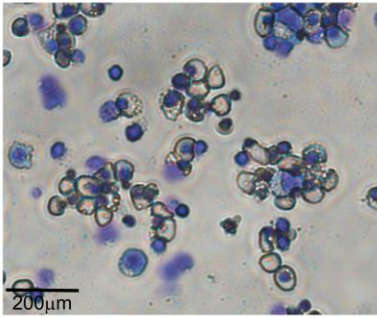

**CD34<sup>+</sup> cells** IMDM + 20%KSR

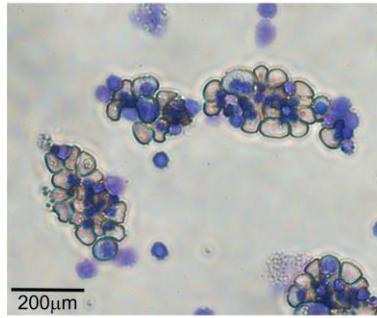

**b. CD34<sup>+</sup> cells**

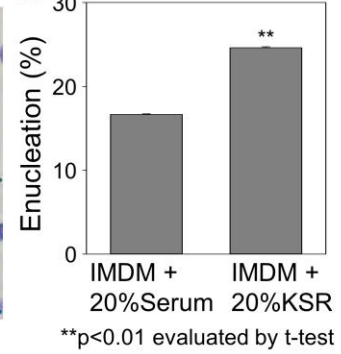

**PBMCs** IMDM + 20%Serum

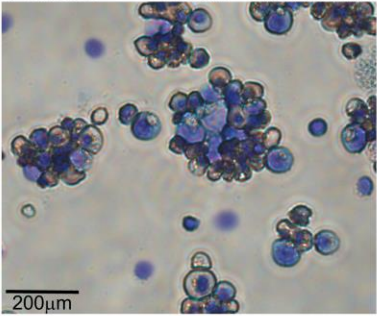

**PBMCs** IMDM + 20%KSR

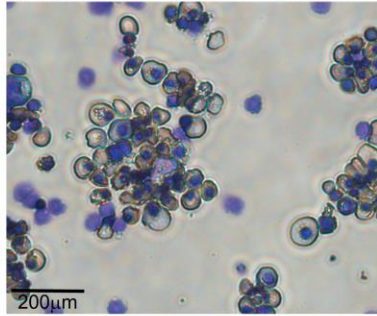

**PBMCs**

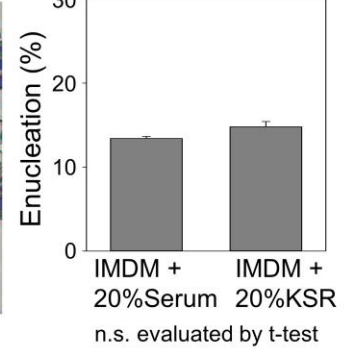

**c. CD34<sup>+</sup> cells**

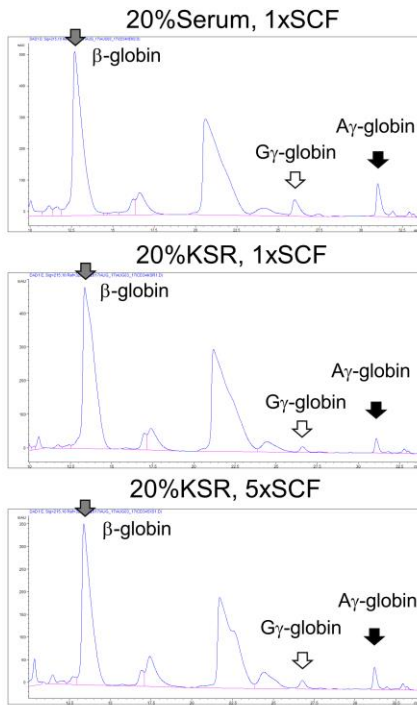

**PBMCs**

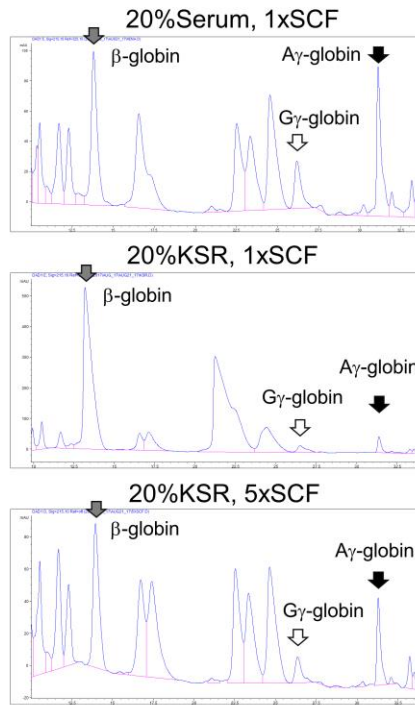

**Supplementary figure 4. Vector construct, cell pellets, and RP-HPLC panels for adult Hb production with  $\beta$ -globin lentiviral transduction in CD34<sup>+</sup> cells and PBMCs from SCD. (a)**

Schematic construct of  $\beta$ -globin-expressing lentiviral vectors (with or without T87Q). (b) Red cell pellets 2 weeks after erythroid differentiation to assess for hemoglobinization. (c) RP-HPLC peaks of  $\beta$ T87Q-globin,  $\beta$ -globin,  $\beta$ S-globin, and  $\gamma$ -globin production from differentiated erythroid cells with lentiviral transduction encoding  $\beta$ T87Q-globin,  $\beta$ -globin, or GFP. LTR: long terminal repeat,  $\psi$ : packaging signal, 3'UTR: 3' untranslated region, P:  $\beta$ -globin promoter, LTR: locus control region, light gray arrow:  $\beta$ T87Q-globin or  $\beta$ -globin, gray arrow:  $\beta$ S-globin, white arrow: G $\gamma$ -globin, black arrow: A $\gamma$ -globin.

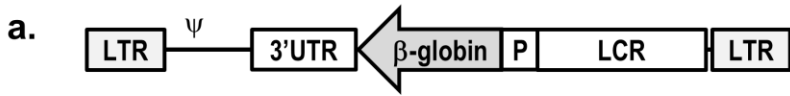

b. **CD34<sup>+</sup> cells** IMDM +20%KSR

|              |          |     |           |
|--------------|----------|-----|-----------|
| βT87Q-globin | β-globin | GFP | No vector |
|--------------|----------|-----|-----------|

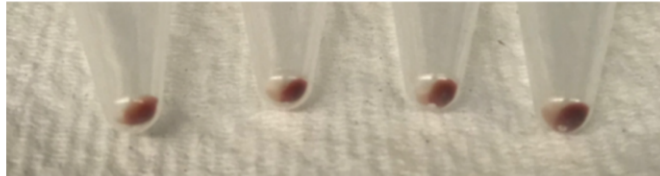

c. **CD34<sup>+</sup> cells**

**PBMCs**

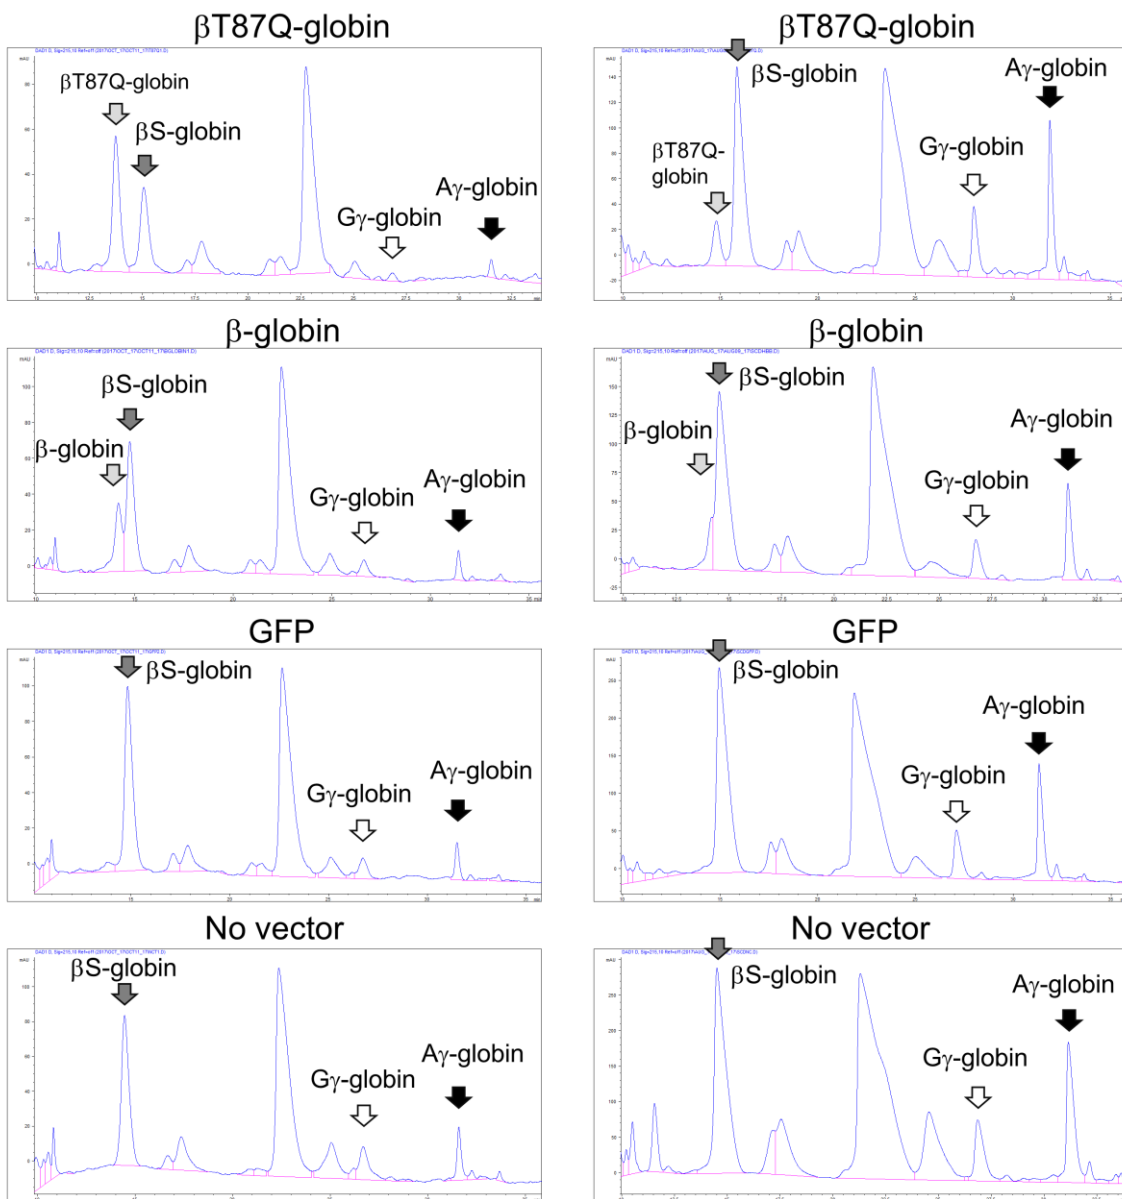

Supplement: mmc1.pdf [file mmc1.pdf]
